# Supplementary material for: The role of a nanoparticle monolayer on the flow of polymer melts in nanochannels
Source: Royal Society of Chemistry journal article supplement (doi:10.1039/c4nr03002h), 2014-01-01
Supplement: c4nr03002h1.pdf [file c4nr03002h1.pdf]

Electronic Supplementary Information For

**The Role of Nanoparticle monolayer on the nanoflowing Behavior of Polymer melts in Nanochannel**

Long-Biao Huang,<sup>ab</sup> Ye Zhou,<sup>ab</sup> Su-Ting Han,<sup>ab</sup> Yan Yan,<sup>ab</sup> Li Zhou,<sup>ab</sup> and V. A. L. Roy\*<sup>ab</sup>

<sup>a</sup> Centre of Super-Diamond and Advanced Films (COSDAF), Department of Physics and Materials Science, City University of Hong Kong, Hong Kong SAR E-mail: [val.roy@cityu.edu.hk](mailto:val.roy@cityu.edu.hk)

<sup>b</sup> Shenzhen Research Institute, City University of Hong Kong, High-Tech Zone, Nanshan District, China.

Email address: [val.roy@cityu.edu.hk](mailto:val.roy@cityu.edu.hk)

**Supplementary Figures**

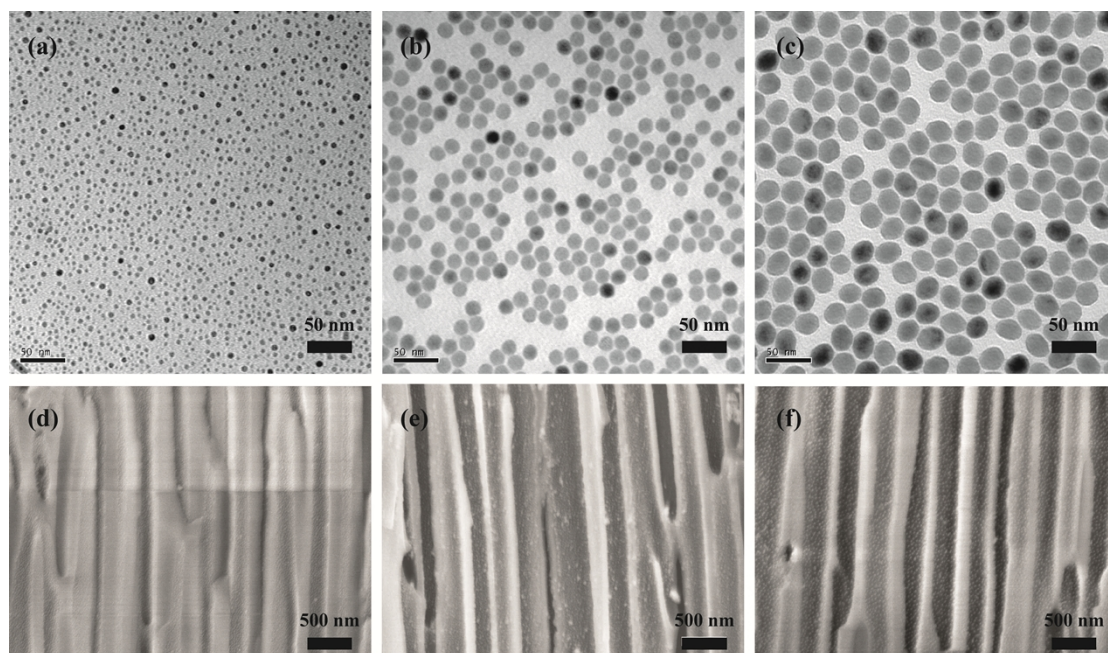

**Fig. S1** The TEM images of 5 nm (a), 15 nm (b) and 25 nm (c) AuNPs and corresponded AuNPs monolayer in the nanochannel of AAO: (d) 5 nm AuNPs monolayers, (e) 15 nm AuNPs monolayers and (f) 25 nm AuNPs monolayers

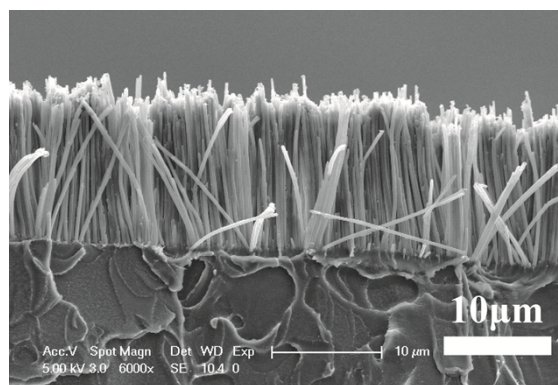

**Fig. S2** SEM cross-section image of PS nanowire from pristine AAO
